# Supplementary material
Source: PubMed Central journal article supplement (PMC10765599)

## **Supplemental Materials and Methods**

### **Primers used in qPCR studies:**

Mouse MYH10 F: gggacttgagtgaggagctg

Mouse MYH10 R: gctttgaacctttcgcttg

Mouse PTCH1 F: ctggactctggctccttgctc

Mouse PTCH1 R: caacagtcaccgaagcagaa

Mouse GLI1 F: gaaggaattcgtgtgccatt

Mouse GLI1 R: gcaaccttcttgctcacaca

Mouse GAPDH F: aactttggcattgtggaagg

Mouse GAPDH R: acacattgggggtaggaaca

### **Western Blots**

Samples were boiled in Laemmli buffer for 10 minutes at 95 C. Samples were run on NuPage 4-12% Bis-Tris 1.0mm Mini Protein gels for 90 minutes at 120 V. Proteins were transferred to PVDF via wet transfer for 90 minutes at 32 V. Blots were blocked with 5% non-fat dry milk (NFDM) for 1 hour and then incubated with primary antibodies overnight in 5% NFDM. Blots were washed with TBST for 10 minutes x 3 and then incubated with HRP-conjugated secondary antibodies diluted in 5% NFDM for 1 hour at room temperature. Blots were again washed in TBST for 10 minutes x 3 and then signal was developed using SuperSignal West Femto Maximum Sensitivity Substrate (ThermoFisher) for 5 minutes at room temperature. Each western blot was performed at least N=3 from samples isolated from independent experiments.

**Supplemental Table S1. Genetic, demographic, and growth, features of the MYH10**

**cohort.** Demographic information including age, sex, and race/ancestry are presented for each individual. Variant information and inheritance data for the identified *MYH10* variant (NM\_001256012.1) is also provided in addition to prior genetic testing and pertinent results. Growth metrics at birth and at last evaluation are also delineated. <sup>a</sup>denotes that the individual is deceased. <sup>b</sup>indicates prenatal demise. Abbreviations: Ind individual, yo years old, mo months old, w weeks gestation, GA gestational age at delivery, Inh inheritance, CMA chromosome microarray, FISH fluorescent *in situ* hybridization, VUS variant of uncertain significance, PW/AS Prader-Willi/Angelman syndrome, SMA spinal muscular atrophy.

**Supplemental Table S2. Dysmorphology identified in individuals with heterozygous**

**MYH10 variants.** The reported dysmorphology for each individual is presented by area. <sup>a</sup>denotes that the individual is deceased. <sup>b</sup>indicates prenatal demise. Abbreviations: Ind individual, mo months old, yo years old.

**Supplemental Table S3. ACMG/ACP classification of variants identified in the MYH10**

**cohort.** ACMG/ACP criteria are listed in addition to the level of evidence (red, very strong; orange, strong; yellow, medium; green, supporting). Overall variant classification is listed below (VUS, variant of uncertain significance; LP, likely pathogenic; P, pathogenic). Note that these criteria are applied assuming the proposed LOF model for the novel disorder. The variants p.(G734D), p.(E737K), and p.(R740Q) met criterion PM1 based on their close proximity to the critical R740 residue in the motor domain.

**Supplemental Figure S1. Full length images of western blot results depicted in the manuscript.** (A) Figure S5A. (B) Figure S11A. (C) Figure S11C. (D) Figure S13U. (E) Figure S14D.

**Supplemental Figure S2. Variant and phenotypic information of previously published heterozygous *MYH10* variants.** (A) Schematic of MYH10 protein structure demarcating the SH3, motor, and myosin tail domains. Variants are mapped to protein structure. (B) Table describing the variant data, inheritance information, phenotypes and gnomAD data for variants identified in the literature. Note that variants 12-15 were excluded from analysis and mapping based on the allele frequency in the gnomAD database. Abbreviations: ASD autism spectrum disorder, ID intellectual disability, GDD global developmental delay, IUGR intrauterine growth restriction, FTT failure to thrive, CDH congenital diaphragmatic hernia, NDD neurodevelopmental disability, AF allele frequency.

**Supplemental Figure S3. Computational predictions of the impact of missense variants on *MYH10* using a variety of prediction algorithms.** The VarSome tool was used to generate computational predictions using 24 algorithms. Both the score and prediction classification are depicted. The total number of pathogenic/deleterious predictions is depicted below each column.

**Supplemental Figure S4. Novel machine learning approaches EVE and VARITY predict pathogenic effects of most identified missense variants.** (A) Table describing the overall EVE and VARITY scores for each variant. (B) Heat map generated by EVE at each amino acid affected by missense variants in the cohort. Data is presented for every possible substitution at each locus. The specific variant substitution is bounded with a white box. Color scale with respect to pathogenicity of the EVE score is shown below. (C) Summary of predictions made by

VARITY at each amino acid affected by missense variants in the cohort. Data is provided for each possible substitution at every amino acid. The specific variant substitution is bounded with a yellow box. Gray boxes indicate substitutions that were not tested by the model. Color scale with respect to the pathogenicity of the VARITY score is depicted below.

**Supplemental Figure S5. Gene editing strategy and allele confirmation for CAS9-edited**

**MYH10 knockout cells.** (A) DNA sequence of the first exon of *MYH10* shows the location of two different gRNAs (gRNA1 and gRNA2) used to generate the *MYH10*-edited cell lines. The start codon is depicted in bold, the seed sequences of each gRNA are shown in red, and their corresponding protospacer adjacent motifs (PAMs) are shown in green. (B, C) Chromatograms from sequencing of cloned fragments of genomic DNA generated from the *MYH10* exon 1 in lines KO-1 (B) and KO-2 (C). Deleted regions are depicted above each chromatogram. Variant annotation is shown below each chromatogram. Note that all variants are predicted to ultimately produce nonsense/frameshift changes. Allele 2 from line KO-1 (B) and alleles 2 and 3 from KO-2 (C) show two independent editing events present *in cis*. The insertion present in allele 3 of KO-2 (C) does not BLAST to any region of the mouse genome in full nor is it present in any of the vectors used in the gene editing strategy. Note that four alleles are identified in each line that is consistent with the mostly tetraploid state of the NIH/3T3 cells.

**Supplemental Figure S6. Validation of CAS9-mediated MYH10 knockout cells and**

**quantification of acetylated tubulin staining.** (A) Western blot of lysates isolated from parental NIH/3T3 cells and various CAS9-edited cell lines and probed with anti-MYH10, anti-MYH9, or anti- $\beta$ -actin antibodies. Note that a faint band is present in *MYH10* KO cell lines and that this band appears at a lower molecular weight compared to wildtype lines. (B-M) Immunofluorescent analysis of MYH10 protein (red, B-E, J-M) and actin (phalloidin, green, F-M) localization in CAS9-edited NIH/3T3 cell lines. Note the linear, filamentous staining in the

parental NIH/3T3 and WT-1 lines (B, C, J, K) that co-localizes with actin (F, G, J, K) that is reduced and discontinuous in line LOW-1 (D, H, L) and absent in line KO-1 (E, I, M). Nuclei are labeled with DAPI (blue, F-M). Scale bar (B) is 5um. (N-U) Immunofluorescent investigation of primary cilia at 20x using antibodies targeting acetylated tubulin (green, N-U) and ARL13B (red, O, Q, S, U) in NIH/3T3 cells (N, O) and lines WT-1 (P, Q), KO-1 (R, S), and KO-2 (T, U). DAPI labels nuclei (blue, O, Q, S, U). Scale bar (N) is 40um. Note increased intensity of extra-ciliary acetylated tubulin staining. (V) Quantification of whole-field acetylated tubulin fluorescent intensity normalized to DAPI fluorescent intensity between different cell lines. This analysis confirms an increase in acetylated tubulin staining in knockout cell lines compared to controls. Images were quantified using imageJ with 3 fields quantified in each independent experiment performed at least N=3.

**Supplemental Figure S7. *MYH10* knockout severely impairs Hedgehog pathway activation downstream of SMO activation and upstream of GLI transcription factor activity.** (A, B) qPCR data measuring the relative expression of the HH targets *PTCH1* (A) and *GLI1* (B) in CAS9-edited lines treated with either control- (blue) or NSHH-conditioned media (red). (C-F) HH luciferase assays performed in lines WT-1 and KO-1 and stimulated with either NSHH conditioned media (C), the SMO agonist SAG (D), transfection of a constitutively active SMO construct (SMOM2, E), or expression of the GLI1 transcription factor (F). Cartoons above assays depict the level at which the pathway is being activated. Representative assays are presented that included 2 biologic replicates for each condition and assays repeated N>3.

**Supplemental Figure S8. *MYH10* knockdown reduces response to HH pathway activation.** (A) qPCR data for *MYH10* expression in NIH/3T3 cells transfected with either control (blue) or *MYH10* siRNA (red) and isolated at 72 and 96 hours post-transfection. (B-C) qPCR data comparing the relative expression of the HH target genes *PTCH1* (B) and *GLI1* (C) in cells

transfected with either control or *MYH10* siRNA and treated with conditioned media isolated from either control transfected cells (PCDNA3) or cells transfected with a construct expressing the secreted and bioactive N-terminal fragment of the SHH ligand (NSHH; red). (D) Hedgehog pathway activity as measured by a HH-responsive luciferase reporter in either control or *MYH10* siRNA transfected NIH/3T3 cells treated with control- (blue) or NSHH-conditioned media (red). Representative assays are shown in each condition, which includes 3 biological replicates and was repeated at least N=3.

**Supplemental Figure S9. Gene editing strategy and allele confirmation for CAS9-edited**

***MYH10* LOW-1 line.** (A) DNA sequence of the first exon of *MYH10* shows the location of two different gRNAs (gRNA1 and gRNA2) used to generate the *MYH10*-edited cell lines. The start codon is depicted in bold, the seed sequences of each gRNA are shown in red, and their corresponding protospacer adjacent motifs (PAMs) are shown in green. (B) Chromatograms from sequencing of cloned fragments of genomic DNA generated from the *MYH10* exon 1 in line LOW-1. Deleted regions are depicted above each chromatogram. Variant annotation is shown below each chromatogram. Note that all variants are predicted to ultimately produce nonsense/frameshift changes. A wildtype allele was also isolated from line LOW-1 (data not shown) demonstrating that 3 of 4 *MYH10* alleles have been edited.

**Supplemental Figure S10. *MYH10* LOW-1 line shows an intermediate phenotype with respect to primary ciliogenesis, ciliary length control, and Hedgehog pathway activation.**

(A-I) Immunofluorescent analysis of acetylated tubulin (AcTub, green; A-C, G-I) and ARL13B (red; D-I) in parental NIH/3T3 cells (A, D, G), line LOW-1 (B, E, H), and line KO-2 (C, F, I). Nuclei are stained with DAPI (blue; D-I). Scale bar in A is 5  $\mu$ m. (J) Analysis of the percentage of cells with primary cilia in control and *MYH10*-edited cell lines. Data was collected from 3 random fields of view (>50 cells/field of view) from maximum intensity projections of Z-stack

images. Each experiment repeated at least N=3. (K) Violin plots of ciliary length between control and *MYH10*-edited cell lines. Ciliary length was measured from 100 cilia from maximal intensity projected Z-stacks for each condition and each condition was repeated at least N=3 from independent experiments. (L) Quantification of mean fluorescent intensity of acetylated tubulin staining normalized to DAPI staining in the indicated cell lines. Each condition repeated at least N=3 from independent experiments. (M-N) qPCR data measuring the relative expression of the HH targets *PTCH1* (M) and *GLI1* (N) in CAS9-edited lines treated with either control- (blue) or NSHH-conditioned media (red). Representative assays are presented that included 2 biologic replicates for each condition and assays repeated N>3.

**Supplemental Figure S11. A second wildtype line demonstrates normal primary cilia and response to Hedgehog signaling.** (A-C) Immunofluorescent analysis of acetylated tubulin (AcTub; green) in parental NIH/3T3 cells (A), line WT-1 (B), and line WT-2 (C). DAPI labels nuclei (blue). Scale bar in A is 5  $\mu$ m. (D) Hedgehog pathway activity as measured by a HH-responsive luciferase reporter in parental NIH/3T3 cells, line WT-1, and line WT-2 that were treated with either DMSO (blue) or SAG (red).

**Supplemental Figure S12. MYH10 undergoes proteolytic cleavage when re-expressed in knockout cells and does not rescue Hedgehog signaling.** (A) Western blot of lysates isolated from NIH/3T3 cells and line KO-1 transfected with *MYH10::HA-pcDNA3* for 24 or 48 hours and probed with an anti-MYH10 and anti-GAPDH antibodies. Note the strong signal from lower molecular weight bands when expressed in line KO-1. (B) HH-luciferase assay comparing control-transfected NIH/3T3 cells and line KO-1 transfected with *pcDNA3* or *MYH10::HA-pcDNA3* treated with either DMSO (blue) or SAG (red) to activate HH signaling. Representative assays are shown for each condition that includes 2 biologic replicates and repeated at least N=3. (C) Western blot analysis of NIH/3T3 cells transfected with the indicated HA-tagged

MYH10 variants and probed with an anti-HA or anti-GAPDH antibodies. Note most protein is found in the full-length formed with minimal cleavage compared to line KO-1 (A).

**Supplemental Figure S13. MYH10 patient variants show normal localization to the actin network.** Immunofluorescent analysis of NIH/3T3 cells transiently transfected with the indicated HA-tagged MYH10 variant constructs for 24 hours and stained with anti-MYH10 (red, A and O) or anti-HA (red, B-G, O-U) in addition to phalloidin-488 (green H-U) to label actin. Nuclei are blue (DAPI). Scale bar in (A) 10um.

**Supplemental Figure S14. MYH10 patient variant overexpression produces a dominant-negative effect on primary ciliary length.** (A) Measurement of mean fluorescent intensity of HA signal by immunofluorescence shows a similar distribution of MYH10 protein overexpression between lines. (B) Violin plots of quantitation of primary ciliary length between NIH/3T3 cell lines stably expressing control (pcDNA3 only), wildtype *MYH10*, p.(G734D), p.(E737K), p.(R740Q), and p.(E1740G). Ciliary length was measured from 100 cilia from maximal intensity projected Z-stacks for each condition and each condition was repeated at least N=3 from independent experiments. (C-T) Representative images of ARL13B (green; C-T) and HA (red; O-T) immunofluorescence in NIH/3T3 stable lines expressing pcDNA3-only (empty vector, C, I, O), wildtype MYH10 (D, J, P), p.(G734D) (E, K, Q), p.(E737K) (F, L, R), p.(R740Q) (G, M, S), and p.(E1740G) (H, N, T). Note that all constructs are HA-tagged to distinguish endogenous vs exogenous protein expression. Nuclei are stained with DAPI (blue; C-T). Panels I-N reflect magnified regions of the boxes outlined in C-H. Scale bar (C) is 10 um. (U) Western blot analysis of HA-expression in monoclonal stable cell lines expressing empty vector (pcDNA3), wildtype *MYH10* (WT), p.(R740Q), and p.(E1740G). GAPDH is used as a loading control.



**Supplemental Figure S15. *MYH10* knockout in human RPE-1 cells significantly impacts primary ciliogenesis and ciliary length control.** (A) Sequence of exon 1 of human *MYH10*. The gRNA sequence is indicated in red and the corresponding PAM is in red. (B-C) Sequence confirmation of loss-of-function alleles in lines KO-1 (B) and KO-2 (C). (D) Western blot analysis of *MYH10* expression in the indicated cell lines. Note that a faint residual band is observed in line KO-1. GAPDH is used as a loading control. (E-P) Immunofluorescent analysis of human RPE-1 cilia labeled with acetylated tubulin (green, E-H) and ARL13B (red, I-P) in parental RPE-1 cells (E, I, M), WT-1 (F, J, N), KO-1 (G, K, O), and KO-2 (H, L, P). DAPI labels nuclei (blue; I-P). Scale bar in J (10  $\mu$ m). (Q) Analysis of the percentage of cells with primary cilia in control and knockout RPE-1 cell lines. (R) Violin plots of ciliary length between control and knockout RPE-1 cell lines. For ciliogenesis quantification, data was collected from 3 random fields of view (>50 cells/field of view) from maximum intensity projections of Z-stack images. Each experiment independently repeated at least N=3. For ciliary length quantitation, 100 cilia were measured from maximal intensity projected Z-stacks for each condition and each experiment was repeated independently at least N=3.



**Table S2**

| Ind# | Age               | Sex | Variant                                     | Head/Face                                                  | Eyes                                                    | Ears                                                         | Nose                                                                   | Mouth/Chin                                                                                                                  | Extremities                                                        |
|------|-------------------|-----|---------------------------------------------|------------------------------------------------------------|---------------------------------------------------------|--------------------------------------------------------------|------------------------------------------------------------------------|-----------------------------------------------------------------------------------------------------------------------------|--------------------------------------------------------------------|
| 1    | 16mo              | F   | c.2219G>A;<br>p.(Arg740Gln)                 | Prominent forehead                                         | Hypertelorism                                           | Microtia, low-set and posteriorly rotated, pre-auricular pit | Broad and depressed nasal bridge                                       | N/A                                                                                                                         | Bilateral 5th finger cinodactyly, hypoplastic toe nails            |
| 2    | 22yo <sup>a</sup> | F   | c.2219G>A;<br>p.(Arg740Gln)                 | N/A                                                        | Hypertelorism, epiblepharon                             | Pre-auditory pits                                            | Broad nasal bridge, upturned nasal tip                                 | High palate, supernumerary teeth (8x extractions)                                                                           | Pes planovalgus, 5th finger brachydactyly, 5th finger clinodactyly |
| 3    | 7yo               | F   | c.111G>T;<br>p.(Trp37Cys)                   | N/A                                                        | Hypertelorism                                           | N/A                                                          | N/A                                                                    | N/A                                                                                                                         | 5th finger clinodactyly, curved 3rd/4th toes                       |
| 4    | 39yo              | F   | c.111G>T;<br>p.(Trp37Cys)                   | N/A                                                        | Hypertelorism                                           | N/A                                                          | N/A                                                                    | N/A                                                                                                                         | N/A                                                                |
| 5    | 17mo              | M   | c.4529_4588dup60;<br>p.(Arg1510_Ala1529dup) | High forehead, frontal bossing                             | Hypertelorism, down-slanting palpebral fissures, ptosis | Low-set (left)                                               | Depressed nasal root, broad nasal bridge, small nose, anteverted nares | N/A                                                                                                                         | N/A                                                                |
| 6    | 18yo              | M   | c.1183C>A;<br>p.(Leu395Ile)<br>(mosaic)     | Maxillary hypoplasia                                       | Down-slanting palpebral fissures, ptosis                | N/A                                                          | Large nasal tip, hypoplastic alae, low-hanging columella               | Full lips, retrognathia, small and widely spaced teeth                                                                      | Long thumbs, mildly limited finger extension                       |
| 7    | 9yo               | M   | c.2320G>A;<br>p.(Gly774Ser)                 | N/A                                                        | N/A                                                     | Macrotia                                                     | N/A                                                                    | N/A                                                                                                                         | N/A                                                                |
| 8    | 3yo               | F   | c.2555G>A;<br>p.(Arg852Gln)                 | N/A                                                        | N/A                                                     | N/A                                                          | N/A                                                                    | N/A                                                                                                                         | N/A                                                                |
| 9    | 15yo              | F   | c.2201G>A;<br>p.(Gly734Asp)                 | Coarse facies                                              | Arched eyebrows                                         | N/A                                                          | N/A                                                                    | N/A                                                                                                                         | Genu valgum (right)                                                |
| 10   | 17yo              | F   | c.5219A>G;<br>p.(Glu1740Gly)                | N/A                                                        | N/A                                                     | N/A                                                          | N/A                                                                    | N/A                                                                                                                         | N/A                                                                |
| 11   | 21mo              | M   | c.5519A>G;<br>p.(Lys1840Arg)                | N/A                                                        | N/A                                                     | N/A                                                          | N/A                                                                    | N/A                                                                                                                         | Arthrogryposis                                                     |
| 12   | 14mo              | M   | c.2554C>T;<br>p.(Arg852Trp)                 | N/A                                                        | N/A                                                     | N/A                                                          | N/A                                                                    | N/A                                                                                                                         | N/A                                                                |
| 13   | 23mo              | F   | c.2036 G>A;<br>p.(Gly679Asp)                | Long narrow face, facial asymmetry (right lower than left) | Hypertelorism, ptosis, long lashes                      | Notched tragus bilaterally, prominent lobules                | N/A                                                                    | Long philtrum, broad mouth with bow-shaped vermilion, abnormally angled teeth, prominent overbite, thickened palatal ridges | N/A                                                                |
| 14   | 2yo               | F   | c.2209G>A;<br>p.(Glu737Lys)                 | Flat, square-shaped occiput                                | Hypertelorism                                           | Low-set                                                      | Broad nasal root and tip                                               | N/A                                                                                                                         | Broad toes, 5th toe clinodactyly                                   |
| 15   | 3yo               | M   | c.1220_1221del;<br>p.(Leu407Hisfs*33)       | High forehead                                              | N/A                                                     | N/A                                                          | N/A                                                                    | N/A                                                                                                                         | N/A                                                                |
| 16   | 34wk <sup>b</sup> | M   | c.2002del;<br>p.(Thr668Glnfs*28)            | N/A                                                        | N/A                                                     | N/A                                                          | N/A                                                                    | N/A                                                                                                                         | N/A                                                                |



**Figure S1****A**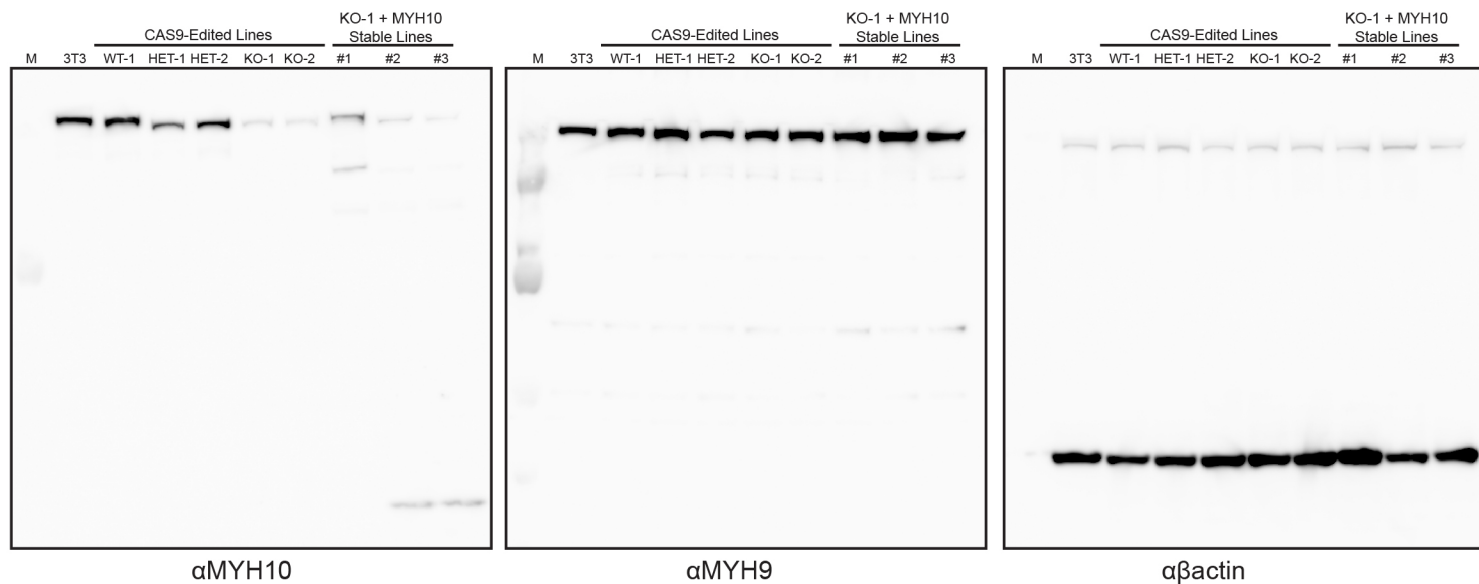**B**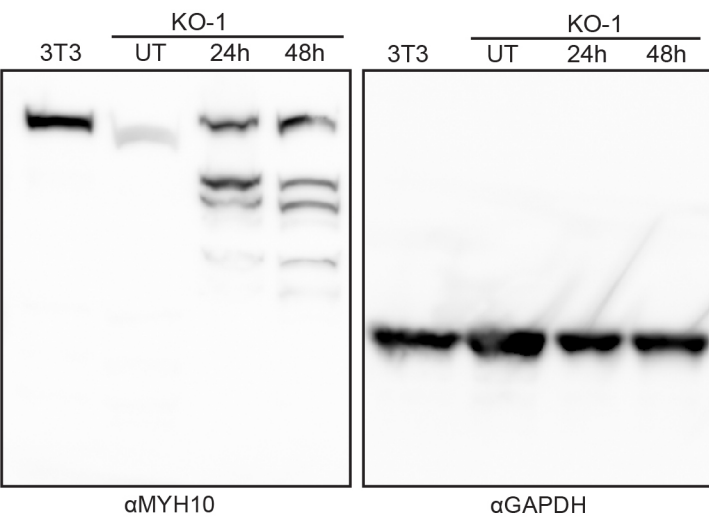**C**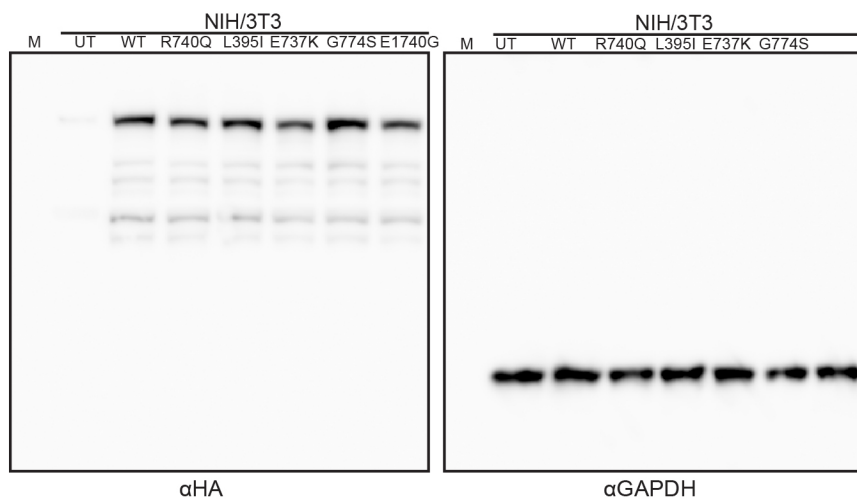**D**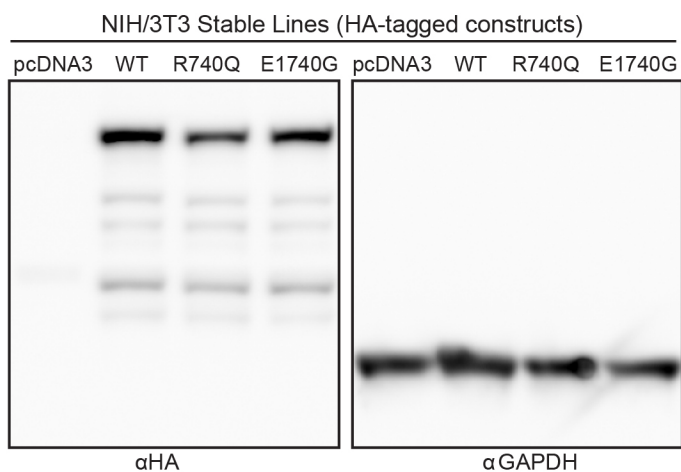**E**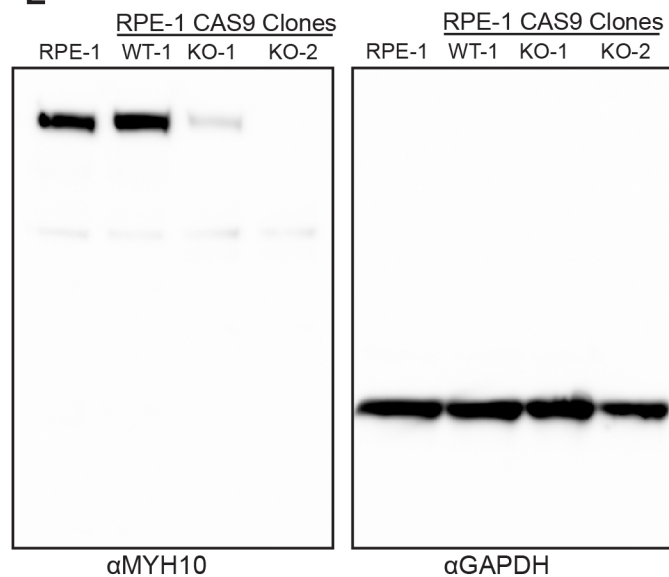

# Figure S2

## A

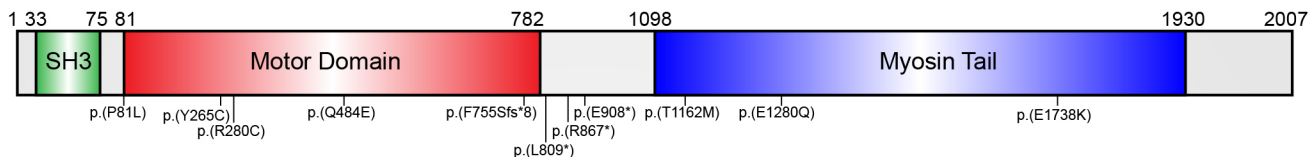

## B

| #  | References | cDNA         | Protein       | Inheritance                     | Phenotype                                                                                                                                                                        | gnomAD       |         |             |
|----|------------|--------------|---------------|---------------------------------|----------------------------------------------------------------------------------------------------------------------------------------------------------------------------------|--------------|---------|-------------|
|    |            |              |               |                                 |                                                                                                                                                                                  | Allele count | AF      | Homozygotes |
| 1  | 14, 15, 16 | c.242C>T     | p.(P81L)      | <i>De novo</i>                  | ASD                                                                                                                                                                              | 0            | 0       | 0           |
| 2  | 21         | c.794A>G     | p.(Y265C)     | <i>De novo</i>                  | ID                                                                                                                                                                               | 0            | 0       | 0           |
| 3  | 13         | c.838C>T     | p.(R280C)     | <i>De novo</i>                  | GDD, ASD, epilepsy, hypotonia, cerebral atrophy, microcephaly, feeding difficulties, aspiration                                                                                  | 0            | 0       | 0           |
| 4  | 17         | c.1450C>G    | p.(Q484E)     | <i>De novo</i>                  | Schizophrenia                                                                                                                                                                    | 0            | 0       | 0           |
| 5  | 14, 15     | c.2264delT   | p.(F755Sfs*8) | <i>De novo</i>                  | ASD                                                                                                                                                                              | 0            | 0       | 0           |
| 6  | 15         | c.2426T>G    | p.(L809*)     | Maternal                        | ASD                                                                                                                                                                              | 0            | 0       | 0           |
| 7  | 11         | c.2599C>T    | p.(R867*)     | <i>De novo</i>                  | Bilateral ventriculomegaly, aqueductal stenosis                                                                                                                                  | 0            | 0       | 0           |
| 8  | 12         | c.2722G>T    | p.(E908*)     | <i>De novo</i>                  | IUGR, FTT, unilateral multicystic dysplastic kidney, CDH, cryptorchidism, hip dysplasia, severe NDD, hypotonia, cerebral and cerebellar atrophy, hydrocephalus, and microcephaly | 0            | 0       | 0           |
| 9  | 22         | c.3485C>T    | p.(T1162M)    | <i>De novo</i>                  | CDH                                                                                                                                                                              | 0            | 0       | 0           |
| 10 | 20, 22     | c.3838C>G    | p.(E1280Q)    | Paternal                        | ASD                                                                                                                                                                              | 0            | 0       | 0           |
| 11 | 20         | N/A          | p.(E1738K)    | <i>In trans</i><br>(Homozygous) | Dysplastic tricuspid valve, pulmonary atresia, unspecified extracardiac manifestations                                                                                           | 0            | 0       | 0           |
| 12 | 18         | c.4714G>A    | p.(V1572M)    | N/A                             | ASD                                                                                                                                                                              | 43/282834    | 1.52e-4 | 0           |
| 13 | 16         | c.2987C>T    | p.(A996V)     | Paternal                        | ASD                                                                                                                                                                              | 2476/281066  | 8.81e-3 | 19          |
| 14 | 16         | c.4672-34C>T | Intronic      | <i>De novo</i>                  | ASD                                                                                                                                                                              | 6/247782     | 2.42e-5 | 0           |
| 15 | 15, 16     | c.4672-33G>A | Intronic      | <i>De novo</i>                  | ASD                                                                                                                                                                              | 14/279368    | 5.01e-5 | 0           |

Figure S3

|                   | p.(W37C)        |        | p.(L395I)       |         | p.(G679D)       |        | p.(G734D)       |        | p.(E737K)       |        | p.(R740Q)       |        |
|-------------------|-----------------|--------|-----------------|---------|-----------------|--------|-----------------|--------|-----------------|--------|-----------------|--------|
|                   | Prediction      | Score  | Prediction      | Score   | Prediction      | Score  | Prediction      | Score  | Prediction      | Score  | Prediction      | Score  |
| BayesDel addAF    | Damaging        | 0.535  | Damaging        | 0.2565  | Damaging        | 0.3497 | Damaging        | 0.5762 | Damaging        | 0.4397 | Damaging        | 0.3928 |
| BayesDel noAF     | Damaging        | 0.5307 | Damaging        | 0.1306  | Damaging        | 0.2645 | Damaging        | 0.5898 | Damaging        | 0.3938 | Damaging        | 0.3263 |
| DANN              | N/A             | 0.9929 |                 | 0.9925  |                 | 0.9987 |                 | 0.9984 |                 | 0.9994 |                 | 0.9995 |
| DEGEN2            | Damaging        | 0.8439 | Damaging        | 0.6801  | Damaging        | 0.8174 | Damaging        | 0.9518 | Damaging        | 0.9453 | Damaging        | 0.8114 |
| EIGEN             | Pathogenic      | 0.9862 | Pathogenic      | 0.5757  | Pathogenic      | 0.9934 | Pathogenic      | 0.9878 | Pathogenic      | 1.0301 | Pathogenic      | 0.8135 |
| EIGEN PC          | Pathogenic      | 0.8845 | Pathogenic      | 0.5593  | Pathogenic      | 0.9519 | Pathogenic      | 0.8029 | Pathogenic      | 0.9339 | Pathogenic      | 0.6636 |
| FATHMM            | Damaging        | -3.34  | Damaging        | -2.87   | Damaging        | -2.22  | Damaging        | -5.07  | Tolerated       | -1.36  | Tolerated       | -1.07  |
| FATHMM-MKL        | Damaging        | 0.9867 | Damaging        | 0.9459  | Damaging        | 0.986  | Damaging        | 0.9831 | Damaging        | 0.9831 | Damaging        | 0.975  |
| FATHMM-XF         | Damaging        | 0.9415 | Damaging        | 0.5371  | Damaging        | 0.9296 | Damaging        | 0.9054 | Damaging        | 0.9046 | Damaging        | 0.8673 |
| LIST-S2           | Damaging        | 0.9922 | Damaging        | 0.9519  | Damaging        | 0.9846 | Damaging        | 0.9963 | Damaging        | 0.9972 | Damaging        | 0.9976 |
| LRT               | Deleterious     | 0      | Deleterious     | 0       | Deleterious     | 0.3497 | Deleterious     | 0      | Deleterious     | 0      | Deleterious     | 0      |
| M-CAP             | Damaging        | 0.5972 | Damaging        | 0.06271 | Damaging        | 0.141  | Damaging        | 0.7709 | Damaging        | 0.5065 | Damaging        | 0.2667 |
| MVP               | Pathogenic      | 0.9842 | Benign          | 0.8925  | Pathogenic      | 0.9258 | Pathogenic      | 0.9899 | Pathogenic      | 0.9584 | Pathogenic      | 0.9697 |
| MetaLRN           | Damaging        | 0.9331 | Damaging        | 0.7749  | Damaging        | 0.8429 | Damaging        | 0.9873 | Damaging        | 0.9063 | Damaging        | 0.9012 |
| MetaRNN           | Damaging        | 0.9573 | Damaging        | 0.6606  | Damaging        | 0.8406 | Damaging        | 0.9918 | Damaging        | 0.9886 | Damaging        | 0.9847 |
| MetaSVM           | Damaging        | 1.0909 | Damaging        | 0.6672  | Damaging        | 0.8325 | Damaging        | 0.9769 | Damaging        | 1.0519 | Damaging        | 1.0336 |
| MutPred           | Pathogenic      | 0.738  | Pathogenic      | 0.675   | Pathogenic      | 0.55   | Pathogenic      | 0.946  | Pathogenic      | 0.937  | Pathogenic      | 0.96   |
| Mutation assessor | High            | 3.875  | Medium          | 3.055   | Medium          | 2.865  | High            | 4.2    | High            | 3.665  | Medium          | 2.77   |
| MutationTaster    | Disease causing | 1      | Disease causing | 0.9999  | Disease causing | 1      | Disease causing | 1      | Disease causing | 1      | Disease causing | 0.9999 |
| PROVEAN           | Damaging        | -12.62 | Neutral         | N/A     | Damaging        | -6.88  | Damaging        | -6.88  | Damaging        | -3.86  | Damaging        | -3.86  |
| PrimateAI         | Damaging        | 0.8726 | Damaging        | 0.8259  | Damaging        | 0.93   | Damaging        | 0.9353 | Damaging        | 0.9122 | Damaging        | 0.867  |
| REVEL             | Pathogenic      | 0.925  | Pathogenic      | 0.6819  | Pathogenic      | 0.8159 | Pathogenic      | 0.9599 | Pathogenic      | 0.948  | Pathogenic      | 0.785  |
| SIFT              | Damaging        | 0      | Damaging        | 0.003   | Damaging        | 0.001  | Damaging        | 0      | Damaging        | 0      | Damaging        | 0      |
| SIFT4G            | Damaging        | 0      | Damaging        | 0.014   | Damaging        | 0.001  | Damaging        | 0.001  | Damaging        | 0.003  | Damaging        | 0.003  |
|                   | 24/24           |        | 22/24           |         | 24/24           |        | 24/24           |        | 23/24           |        | 23/24           |        |

|                   | p.(G774S)       |        | p.(R852Q)       |         | p.(R852W)       |         | p.(E1740G)      |        | p.(K1840R)      |           |
|-------------------|-----------------|--------|-----------------|---------|-----------------|---------|-----------------|--------|-----------------|-----------|
|                   | Prediction      | Score  | Prediction      | Score   | Prediction      | Score   | Prediction      | Score  | Prediction      | Score     |
| BayesDel addAF    | Damaging        | 0.2414 | Damaging        | 0.2546  | Damaging        | 0.2193  | Damaging        | 0.3931 | Tolerated       | 0.05974   |
| BayesDel noAF     | Damaging        | 0.109  | Damaging        | 0.1279  | Damaging        | 0.07732 | Damaging        | 0.3268 | Tolerated       | -0.1519   |
| DANN              |                 | 0.9987 |                 | 0.9996  |                 | 0.9993  |                 | 0.9989 |                 | 0.9757    |
| DEGEN2            | Damaging        | 0.7188 | Damaging        | 0.6839  | Damaging        | 0.7491  | Damaging        | 0.8077 | Tolerated       | 0.1645    |
| EIGEN             | Pathogenic      | 0.5234 | Pathogenic      | 0.9219  | Pathogenic      | 0.4579  | Pathogenic      | 0.7409 | Benign          | 0.007961  |
| EIGEN PC          | Pathogenic      | 0.5496 | Pathogenic      | 0.88372 | Pathogenic      | 0.3757  | Pathogenic      | 0.6185 | Benign          | 0.2043    |
| FATHMM            | Tolerated       | -0.53  | Tolerated       | 2.23    | Tolerated       | 2.12    | Damaging        | -1.66  | Tolerated       | -1.2      |
| FATHMM-MKL        | Damaging        | 0.9908 | Damaging        | 0.9915  | Damaging        | 0.9493  | Damaging        | 0.9829 | Damaging        | 0.9794    |
| FATHMM-XF         | Damaging        | 0.9098 | Damaging        | 0.9152  | Damaging        | 0.7761  | Damaging        | 0.9366 | Damaging        | 0.7736    |
| LIST-S2           | Damaging        | 0.9619 | Damaging        | 0.9931  | Damaging        | 0.9789  | Damaging        | 0.9602 | Damaging        | 0.8959    |
| LRT               | Deleterious     | 0      | Deleterious     | 0       | Deleterious     | 0       | Deleterious     | 0      | Deleterious     | 1.00E-006 |
| M-CAP             | Damaging        | 0.1007 | Tolerated       | 0.02307 | Tolerated       | 0.02362 | Damaging        | 0.2979 | Tolerated       | 0.01144   |
| MVP               | Benign          | 0.8167 | Benign          | 0.8373  | Benign          | 0.8995  | Benign          | 0.8454 | Benign          | 0.8183    |
| MetaLRN           | Damaging        | 0.6717 | Tolerated       | 0.1824  | Tolerated       | 0.1293  | Damaging        | 0.7643 | Tolerated       | 0.2949    |
| MetaRNN           | Damaging        | 0.6198 | Damaging        | 0.7929  | Damaging        | 0.8505  | Damaging        | 0.9086 | Tolerated       | 0.4045    |
| MetaSVM           | Damaging        | 0.034  | Tolerated       | -0.6469 | Tolerated       | -0.9746 | Damaging        | 0.7452 | Tolerated       | -0.5431   |
| MutPred           | Benign          | 0.445  | N/A             | N/A     | Pathogenic      | 0.627   | Pathogenic      | 0.61   | Benign          | 0.33      |
| Mutation assessor | Low             | 1.075  | Medium          | 3.245   | Medium          | 1.985   | High            | 3.885  | Low             | 0.805     |
| MutationTaster    | Disease causing | 1      | Disease causing | 1       | Disease causing | 0.9999  | Disease causing | 1      | Disease causing | 1         |
| PROVEAN           | Damaging        | -5.83  | Damaging        | -3.66   | Damaging        | -7.32   | Damaging        | 0.8529 | Tolerated       | 0.7369    |
| PrimateAI         | Damaging        | 0.9171 | Damaging        | 0.8733  | Damaging        | 0.9223  | Tolerated       | 0.76   | Tolerated       | 0.7369    |
| REVEL             | Benign          | 0.6069 | Benign          | 0.4289  | Benign          | 0.4259  | Pathogenic      | 0.8529 | Benign          | 0.3429    |
| SIFT              | Tolerated       | 0.141  | Damaging        | 0.003   | Tolerated       | 0.109   | Damaging        | 0      | Tolerated       | 1         |
| SIFT4G            | Tolerated       | 0.323  | Damaging        | 0.017   | Tolerated       | 0.1     | Damaging        | 0.001  | Tolerated       | 0.877     |
|                   | 17/24           |        | 17/23           |         | 16/24           |         | 22/24           |        | 5/24            |           |

Figure S4

A

| Variant    | EVE Score | EVE Class (75%) | VARITY_R | VARITY_ER |
|------------|-----------|-----------------|----------|-----------|
| p.(W37C)   | 0.977     | Pathogenic      | 0.966    | 0.89      |
| p.(L395I)  | 0.51      | Uncertain       | 0.594    | 0.289     |
| p.(G679D)  | 0.856     | Pathogenic      | 0.908    | 0.944     |
| p.(G734D)  | 0.979     | Pathogenic      | 0.961    | 0.908     |
| p.(E737K)  | 0.991     | Pathogenic      | 0.931    | 0.81      |
| p.(R740Q)  | 0.972     | Pathogenic      | 0.802    | 0.616     |
| p.(G774S)  | 0.461     | Uncertain       | 0.832    | 0.696     |
| p.(R852Q)  | 0.662     | Pathogenic      | 0.816    | 0.654     |
| p.(R852W)  | 0.792     | Pathogenic      | 0.825    | 0.737     |
| p.(E1740G) | 0.869     | Pathogenic      | 0.805    | 0.745     |
| p.(K1840R) | 0.0942    | Benign          | 0.105    | 0.117     |

B

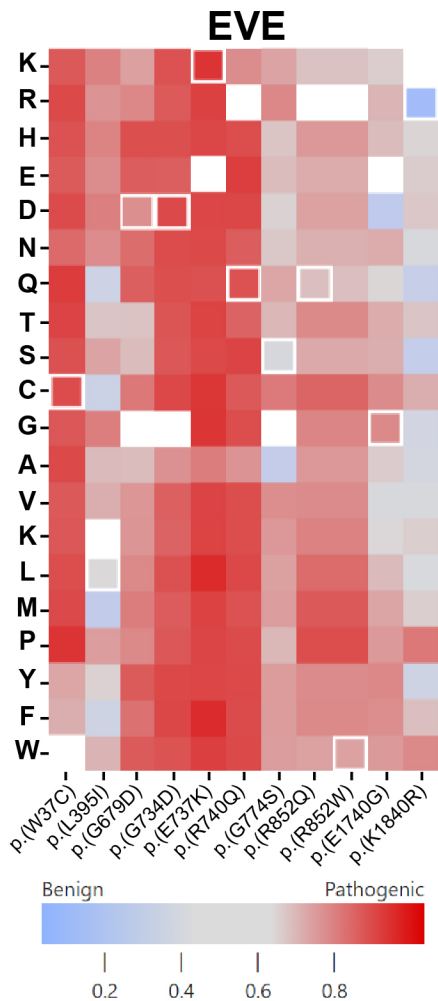

C

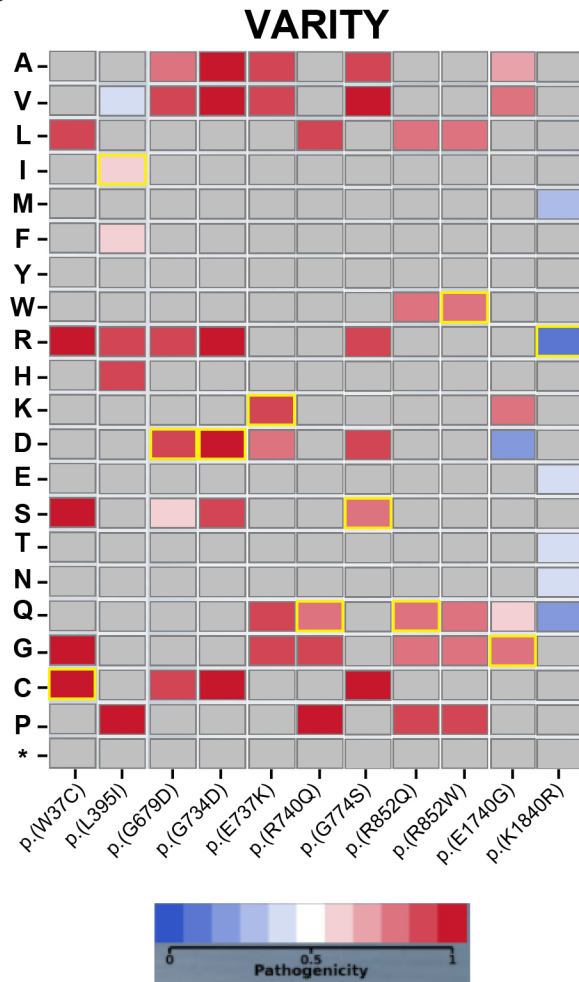



# Figure S5

**A**

## Exon 1 (mouse NIH/3T3)

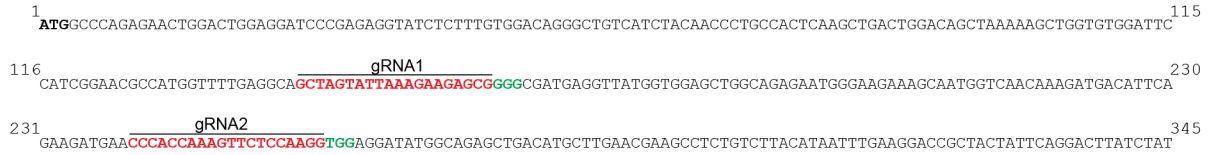

**B**

## Line: KO-1

### Allele #1

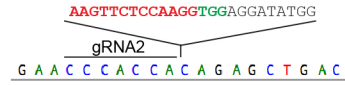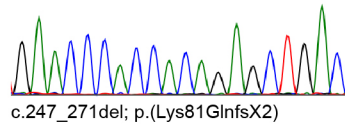

### Allele #3

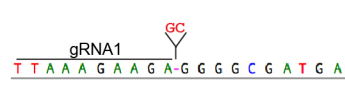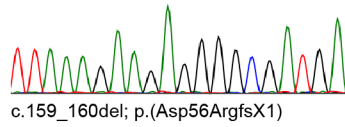

### Allele #2 (both variants in cis)

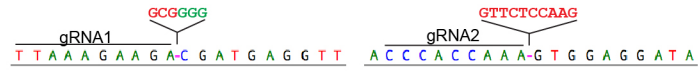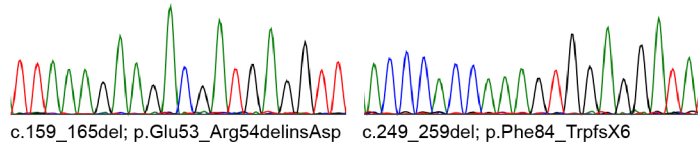

### Allele #4

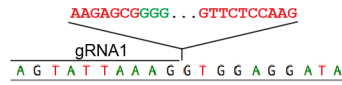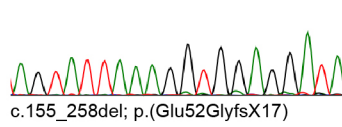

**C**

## Line: KO-2

### Allele #1

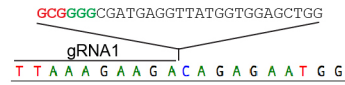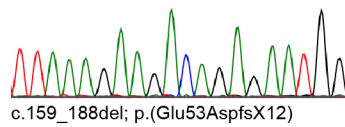

### Allele #2 (both variants in cis)

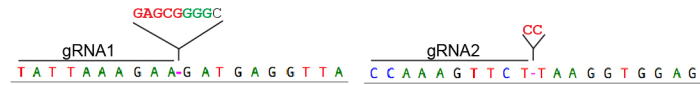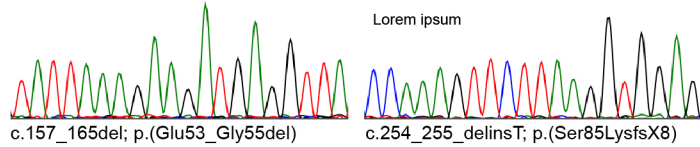

### Allele #3 (both variants in cis)

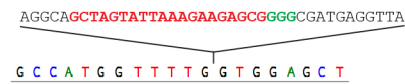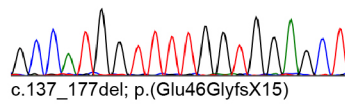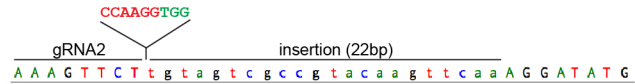

### Allele #4

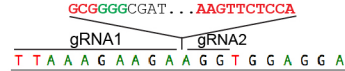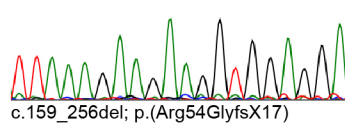

**Figure S6**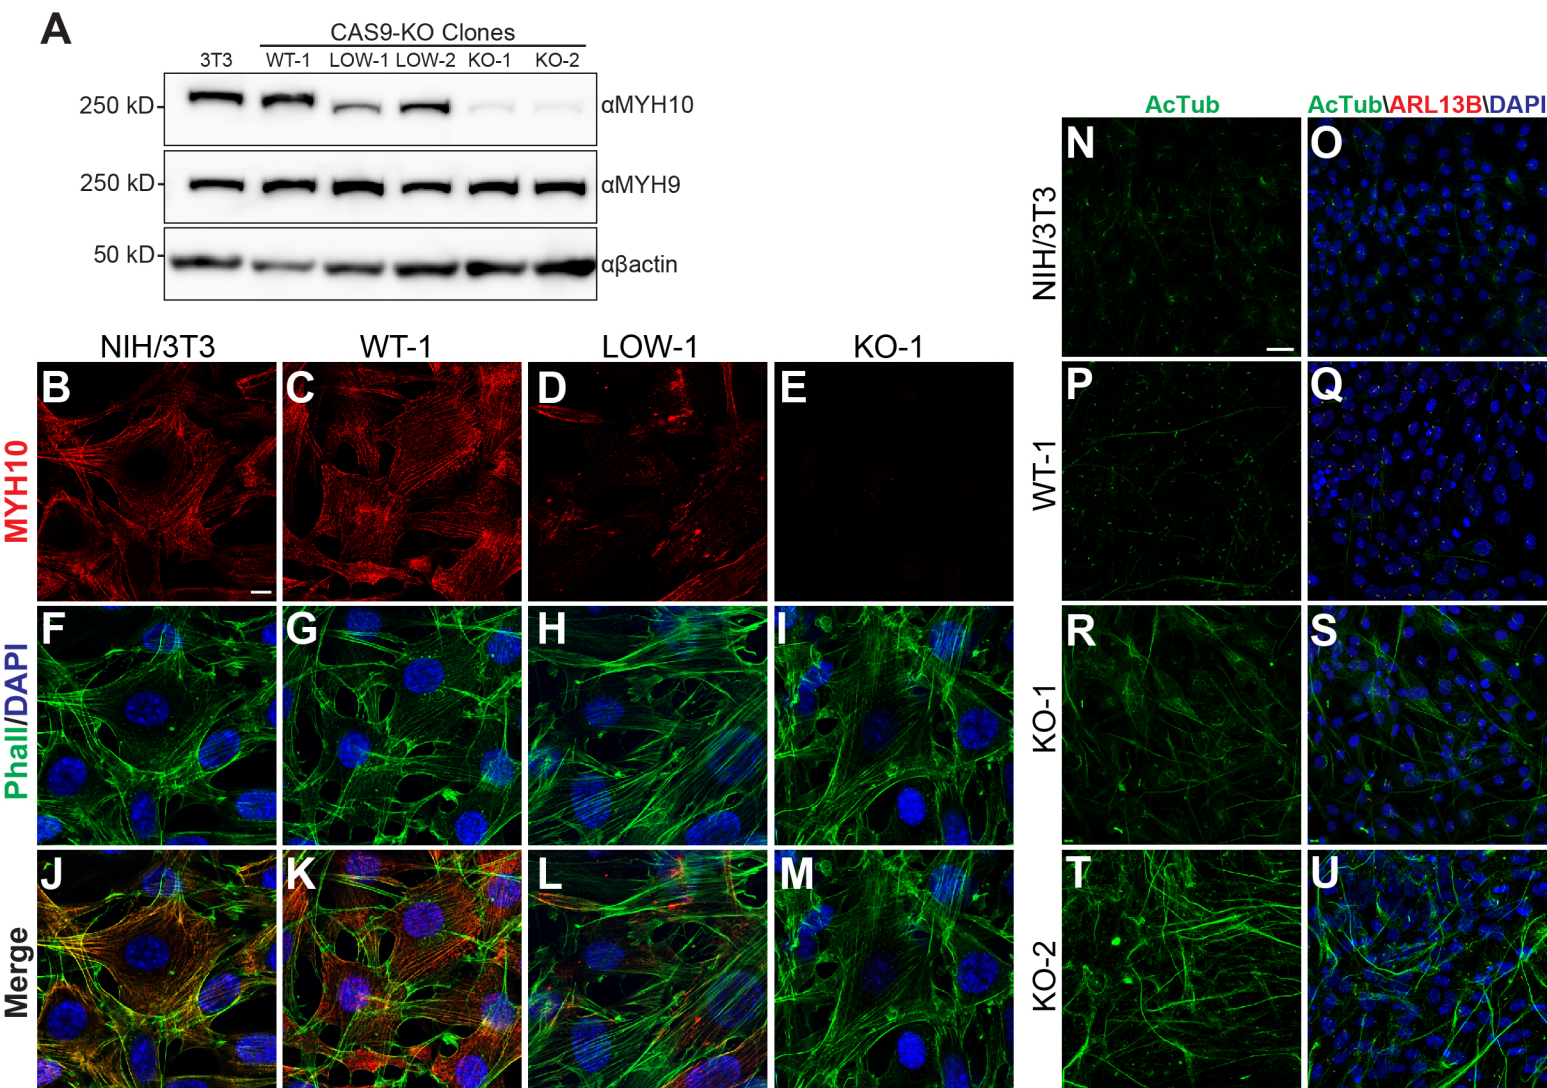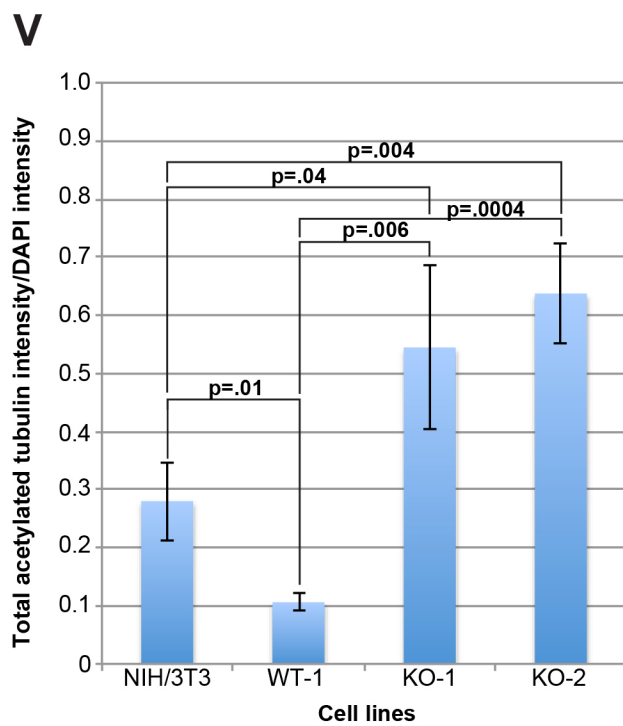

Figure S7

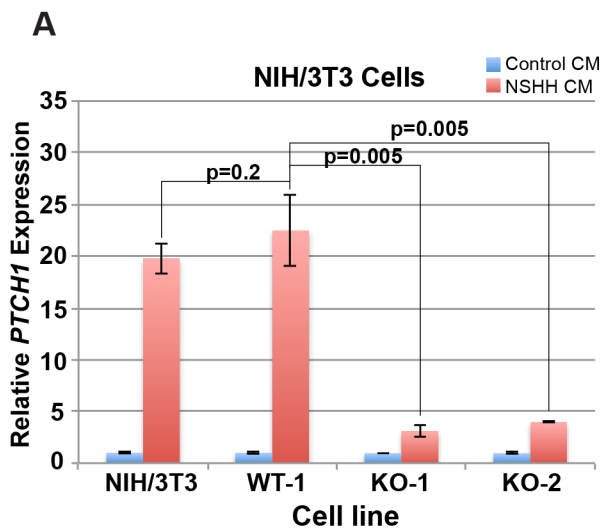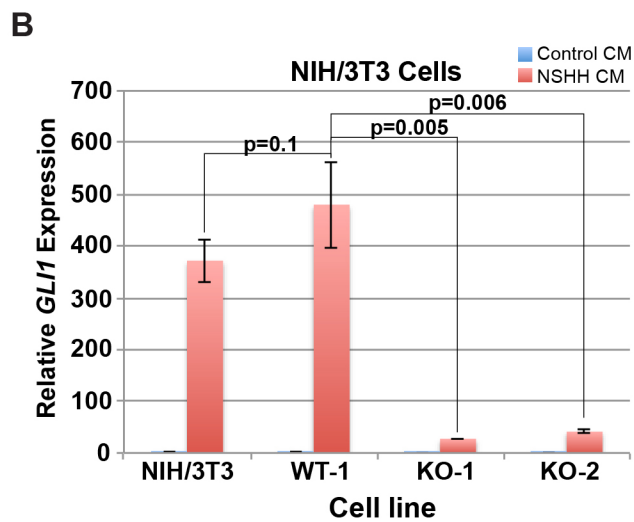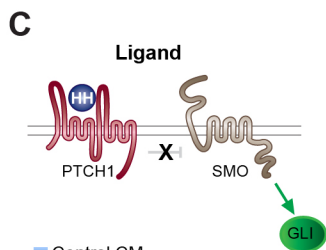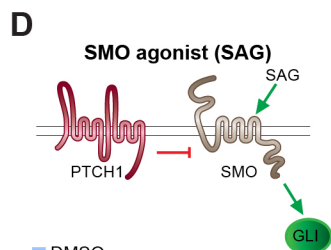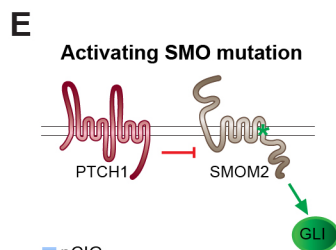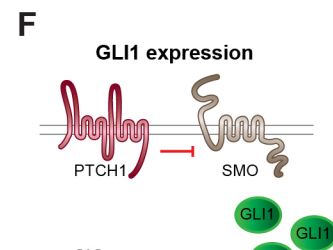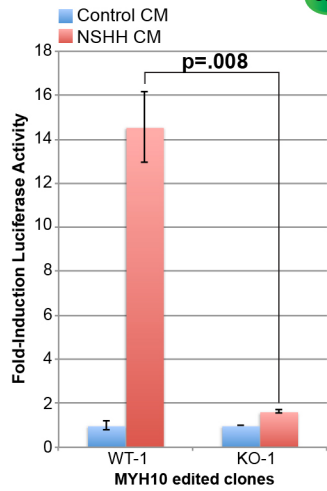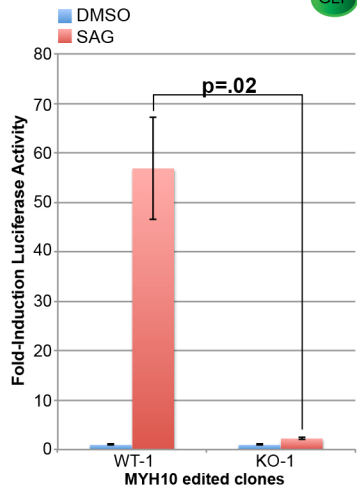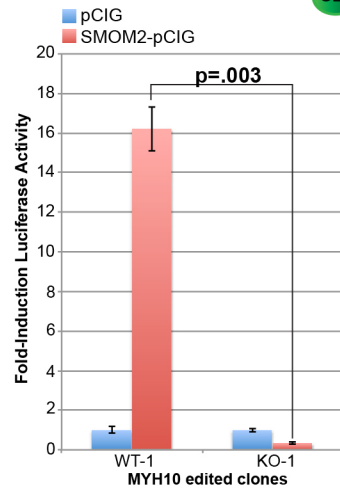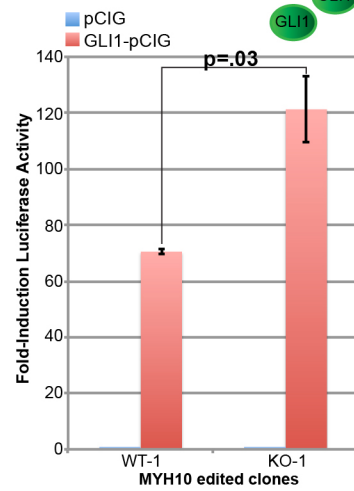

**Figure S8****A**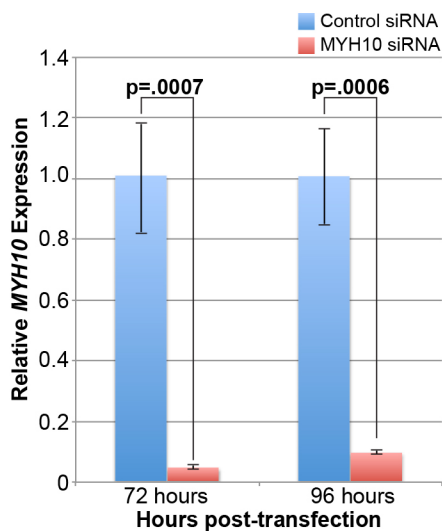**B**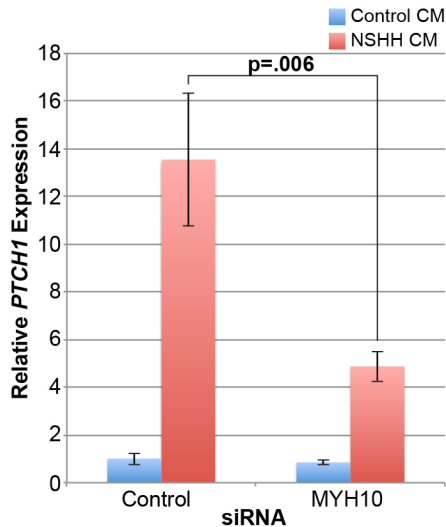**C**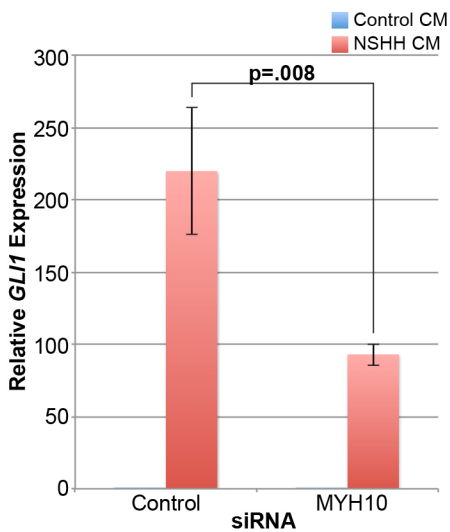**D**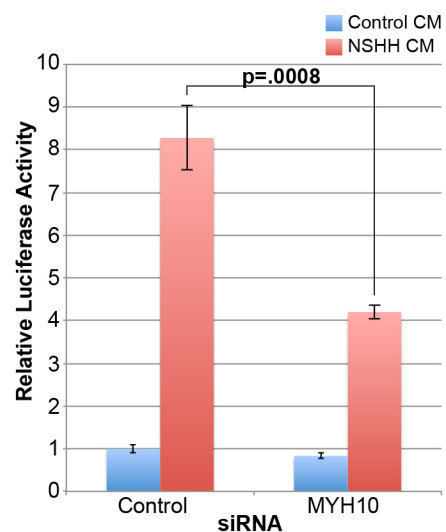

# Figure S9

## A

### Exon 1

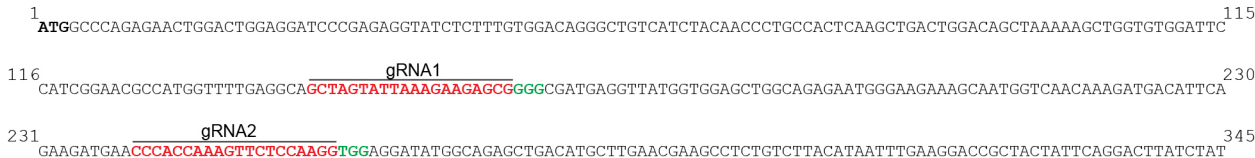

## B

### Line: LOW-1

#### Allele #1

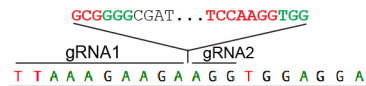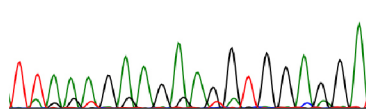

c.159\_256del; p.(Arg54GlyfsX17)

#### Allele #2

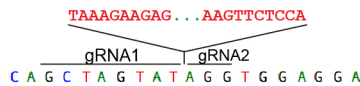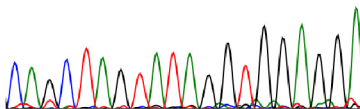

c.150\_256del; p.(Lys51GlyfsX17)

#### Allele #3

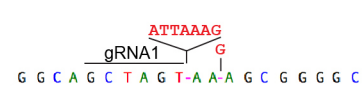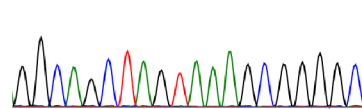

c.148\_157delinsAA; p.(Ile50LysfsX4)

Figure S10

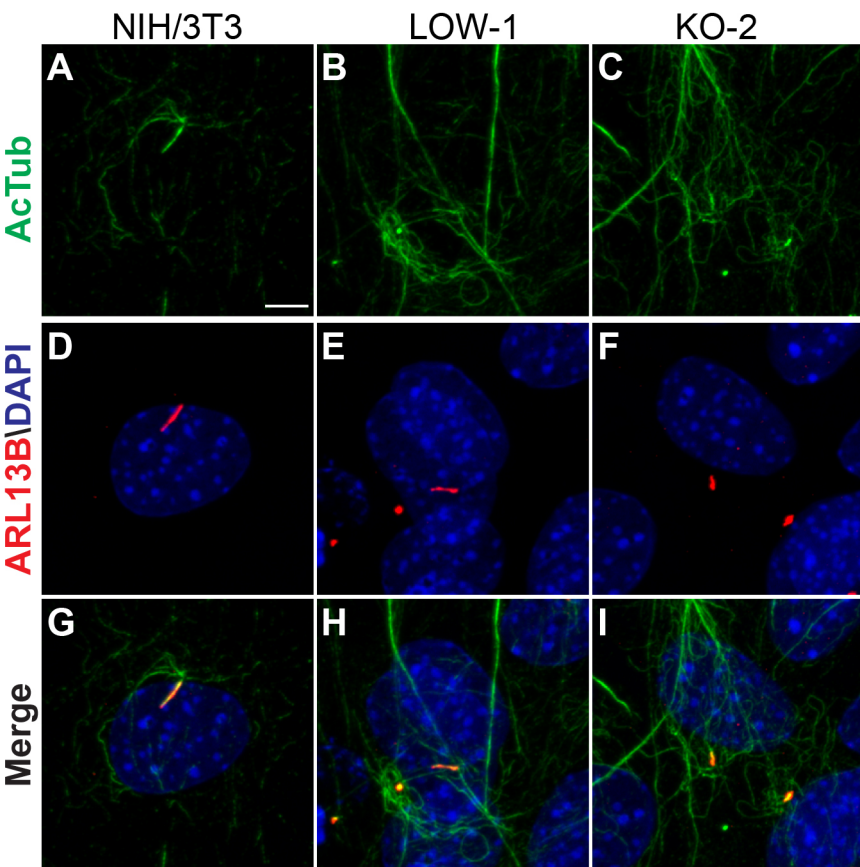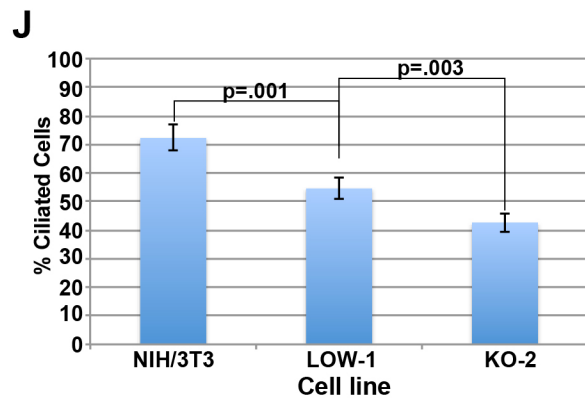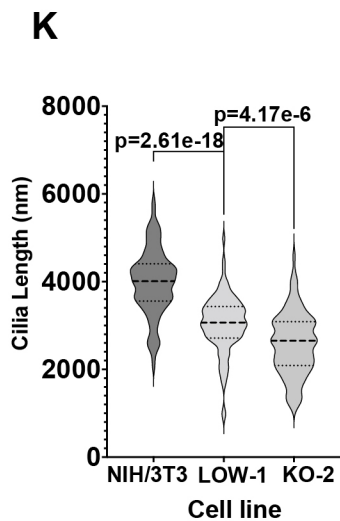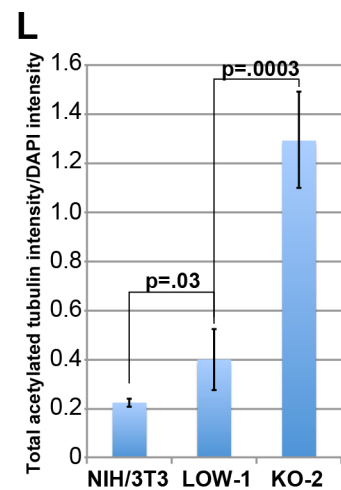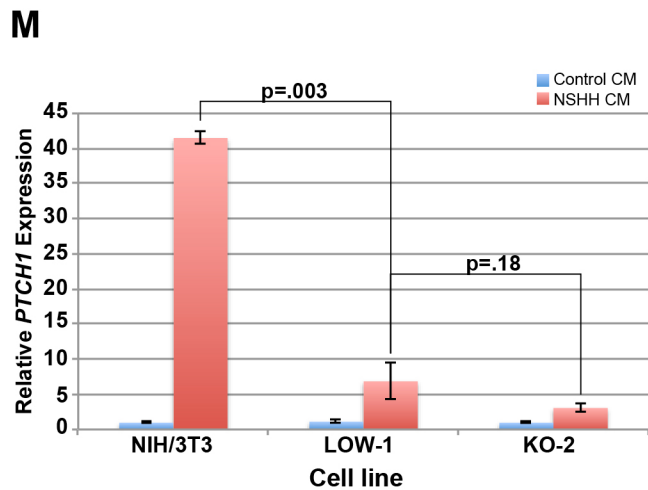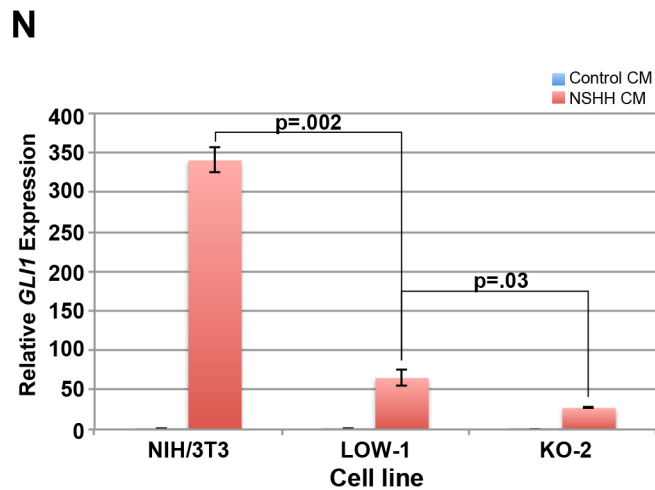

Figure S11

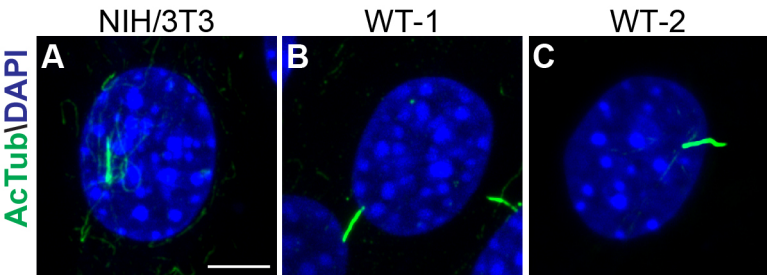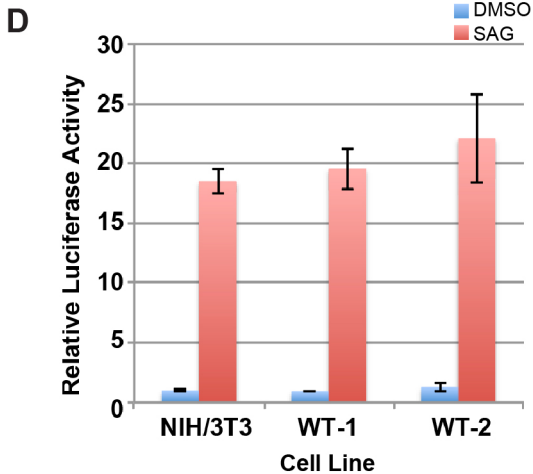

Figure S12

**A**

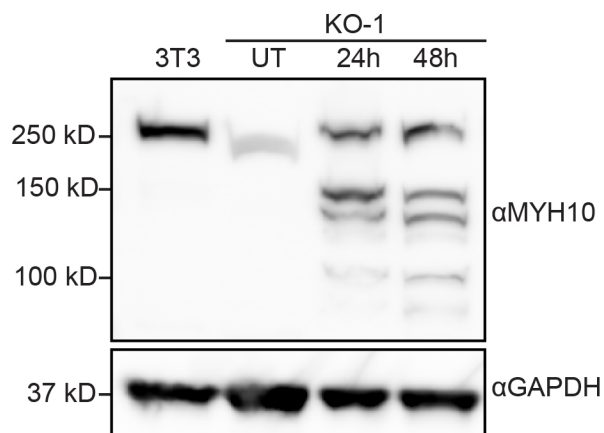

**B**

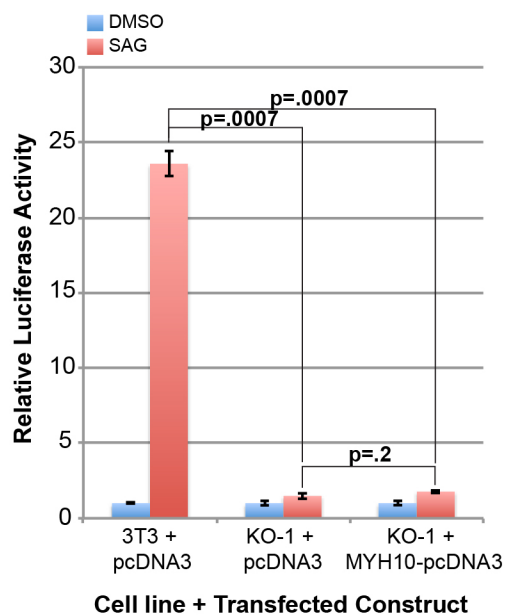

**C**

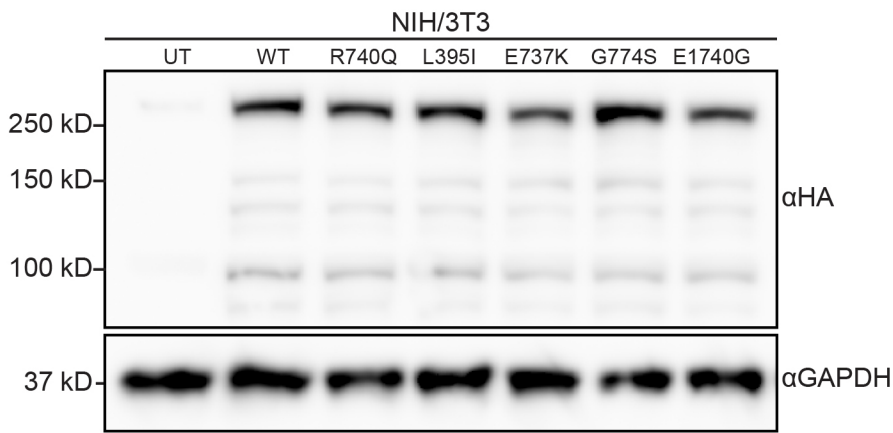



**Figure S13**

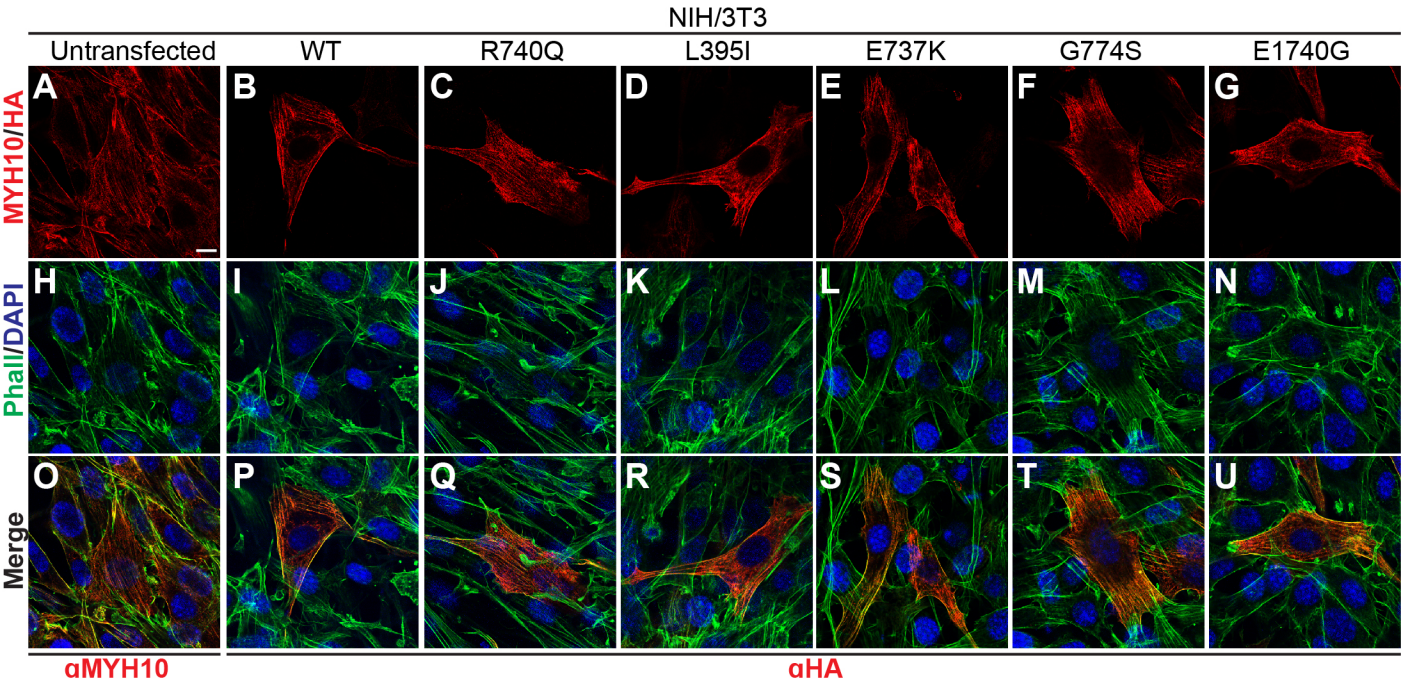

Figure S14

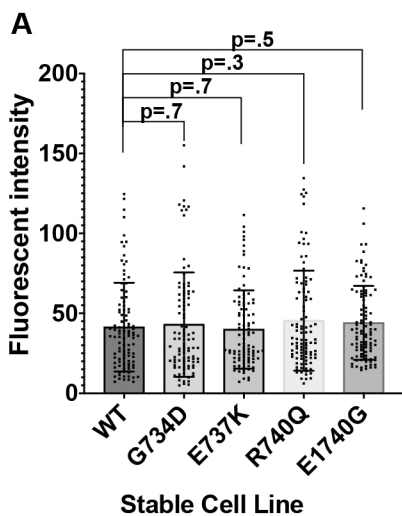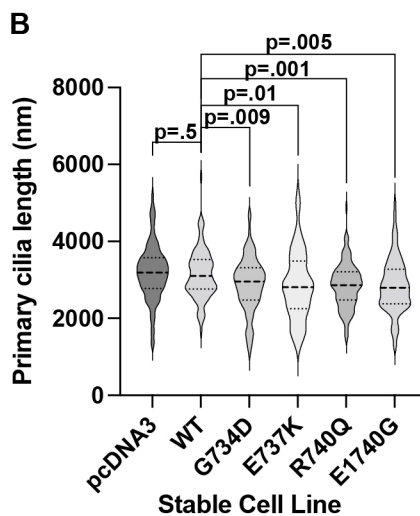

NIH/3T3 Stable Lines (HA-tagged *MYH10* variants)

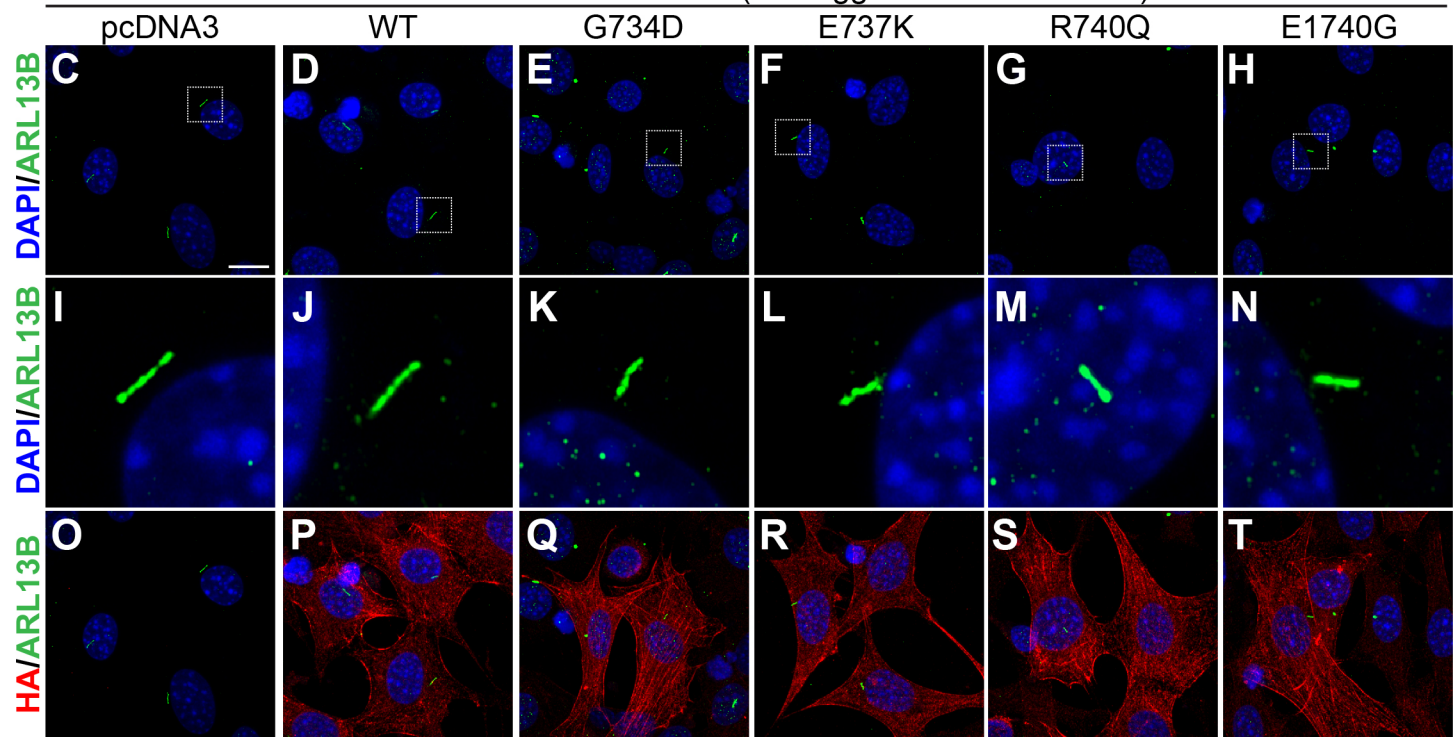

**U**

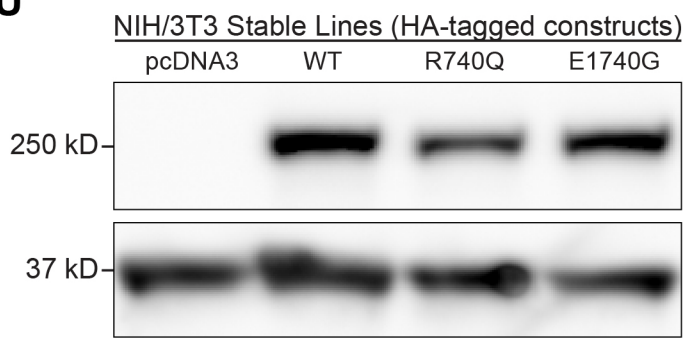

A

**Exon 1 (human RPE-1)**

```

1 ATGGCGCAGAGAAGTGGACTCGAGGATCCAGAGAGTATCTCTTTGTGGACAGGGGTGTTCATCTACAACCTGCCACTCAAGCTGATTGGACAGCTAAAAAGCTAGTGTGGATTC 115
116 CATCAGAACGCCATGGTTTTGAGGCA gRNA1 GCTAGTATCAAAGAAGAAGCGGGGAGATGAAGTTATGGTGGAGTTGGCAGAGAATGAAAGAAAGCAATGGTCAACAAAGATGATATTTCA 230
231 GAAGATGAACCCACCTAAGTTTTCCAAAGTGGAGGATATGGCAGAATTGACATGCTTGAATGAAGCTCCGTTTTACATAATCTGAAGGATCGCTACTATTCCAGGACTAATCTAT 345
    
```

B

**Line: KO-1**

Allele #1

gRNA1 insA  
G T A T C A A A G A A G A A A C G G G G G

Allele #2

gRNA1 insG  
A A A G A A G A G A C G G G G A G A T G

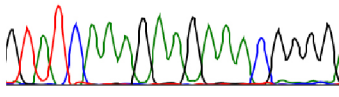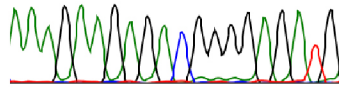

C

**Line: KO-2**

Allele #1

gRNA1 insA  
C A A A G A A G A A A C G G G G G

Allele #2

gRNA1 delA  
C A A A G A A G A C G G G G G

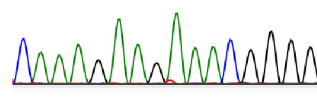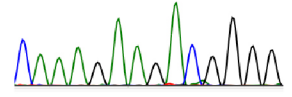

D

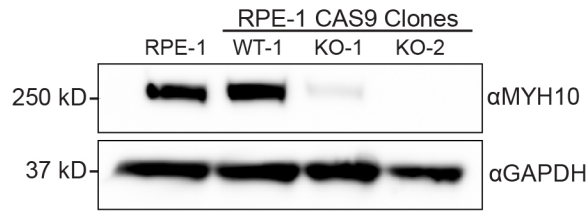

*MYH10*<sup>-/-</sup> RPE-1 clones

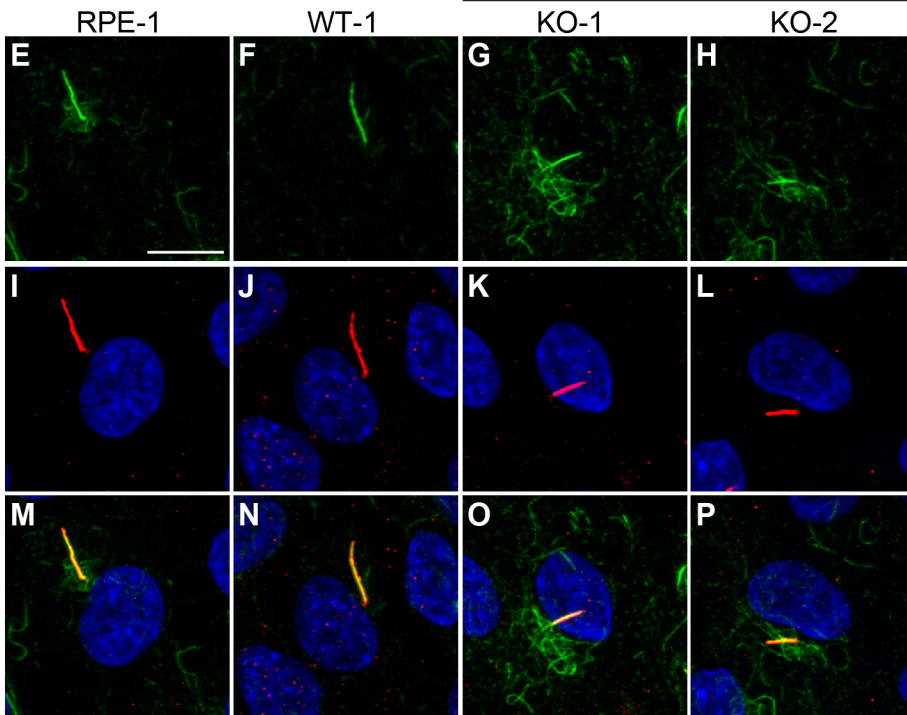

Q

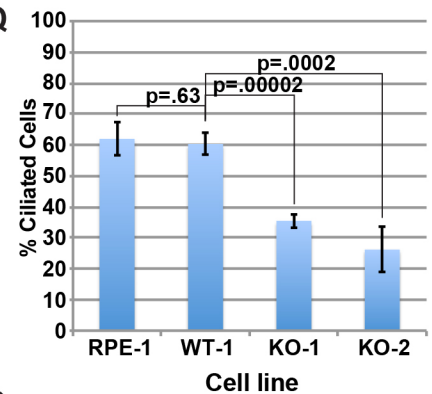

R

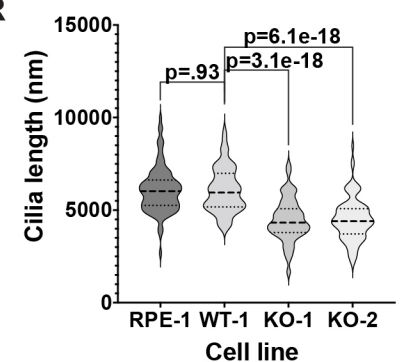

Supplement: NIHMS1948410-supplement-Supplemental_Methods_and_Figures.pdf [file NIHMS1948410-supplement-Supplemental_Methods_and_Figures.pdf]
